# Supplementary material
Source: publisher figshare collection journal article supplement (https://acs.figshare.com/ndownloader/files/5684217)
Supplement: Supplementary file 1 [file 5684217]

## Supporting Information

### Estimated Effects of Temperature on Secondary Organic Aerosol Concentrations

Paul E. Sheehan, Frank M. Bowman

6 pages

**Figure S1.** Daily temperature profiles used in model simulations.

**Figure S2.** Daily concentration profiles for AP and  $S_1+S_2$  in base case simulation. [AP] is gas-phase concentration.  $[S_1]+[S_2]$  is the sum of gas- and aerosol-phase concentrations for both compounds.

**Figure S3.** Daily AP organic aerosol concentrations for three temperature profiles,  $T = 25 \pm 0, \pm 5, \pm 10$  °C.

**Figure S4.** Daily AP organic aerosol concentrations for  $H_i = 0, 10, 17.5, 25$  kcal mol<sup>-1</sup>.

**Figure S5.** Daily AP organic aerosol concentrations for HYA emissions = 0.5, 1.0, 2.0 times base case simulation levels.

**Figure S6.** Daily AP organic aerosol concentrations for POA = 0, 10, 20  $\mu\text{g m}^{-3}$ .

MAR 02, 2001

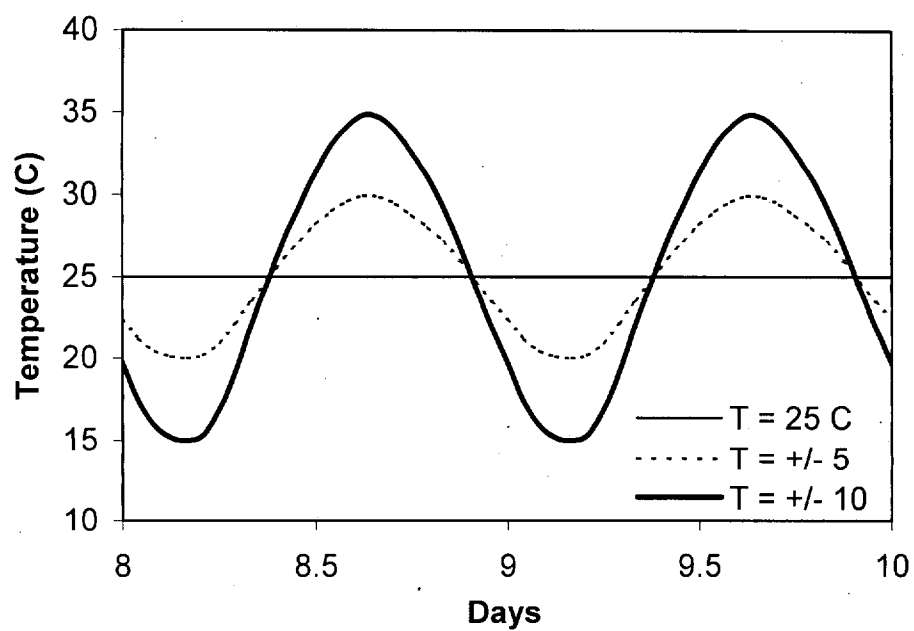

**Figure S1.** Daily temperature profiles used in model simulations.

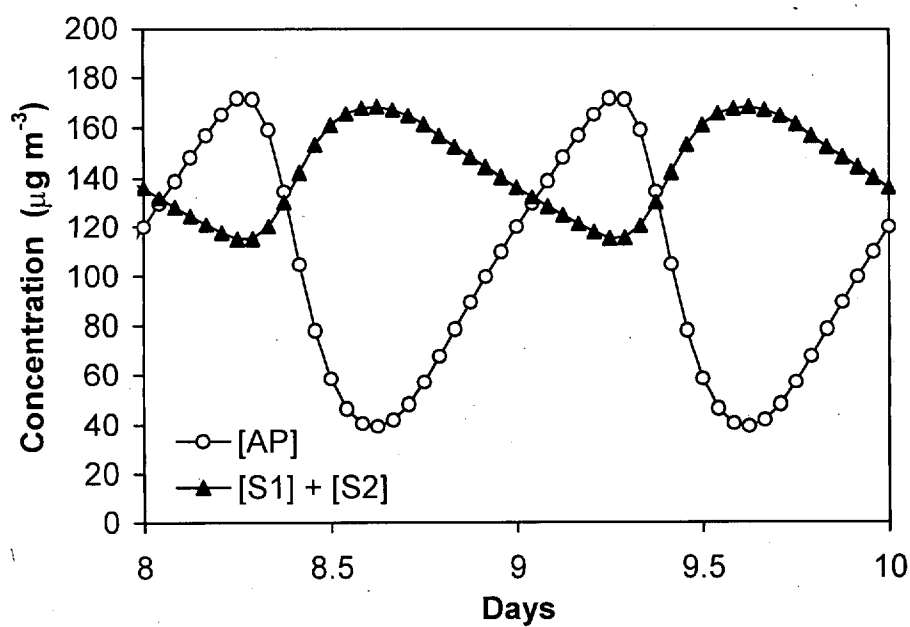

**Figure S2.** Daily concentration profiles for AP and  $S_1+S_2$  in base case simulation. [AP] is gas-phase concentration.  $[S_1]+[S_2]$  is the sum of gas- and aerosol-phase concentrations for both compounds.

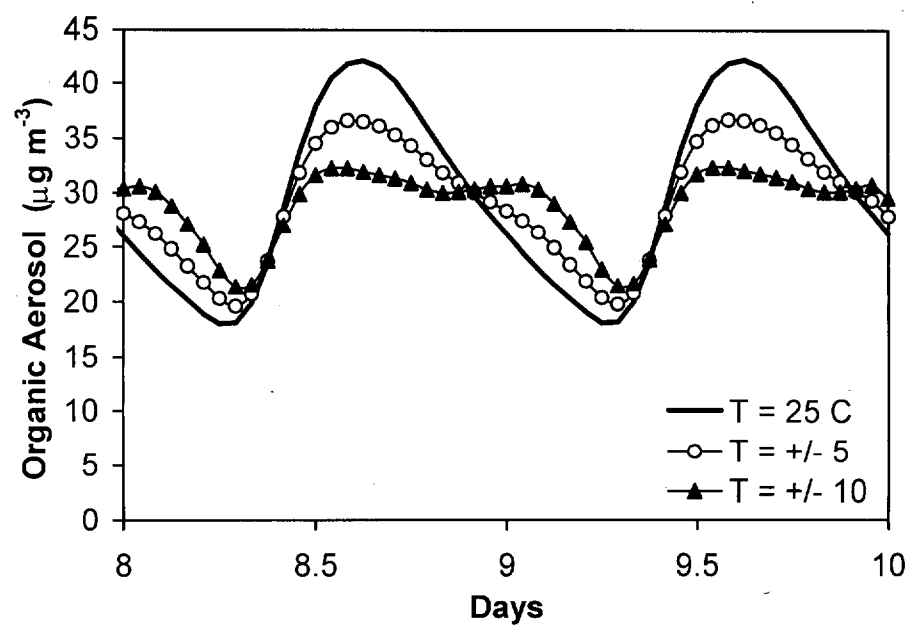

**Figure S3.** Daily AP organic aerosol concentrations for three temperature profiles,  $T = 25 \pm 0, \pm 5, \pm 10\text{ }^{\circ}\text{C}$ .

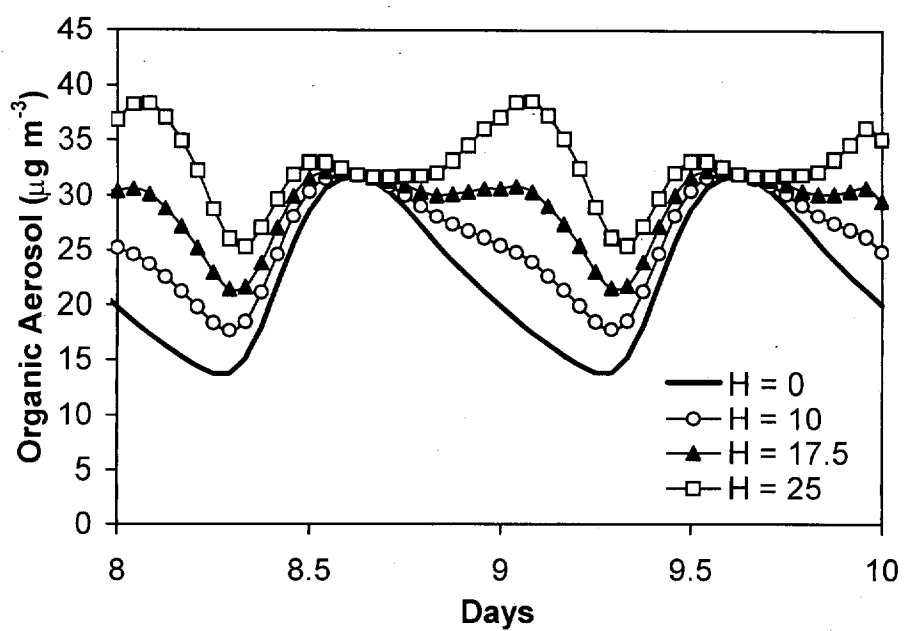

**Figure S4.** Daily AP organic aerosol concentrations for  $H_i = 0, 10, 17.5, 25$  kcal  $\text{mol}^{-1}$ .

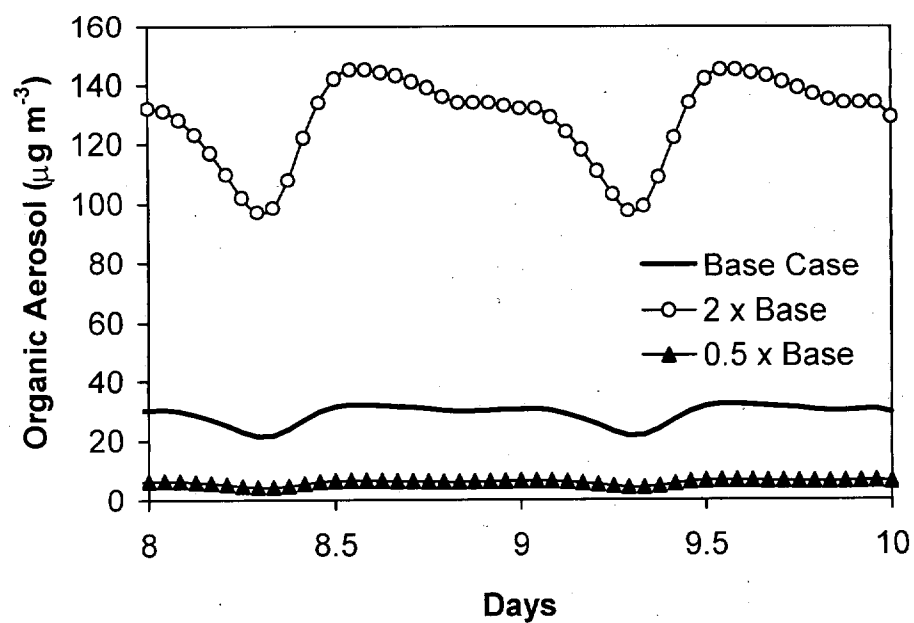

**Figure S5.** Daily AP organic aerosol concentrations for HYA emissions = 0.5, 1.0, 2.0 times base case simulation levels.

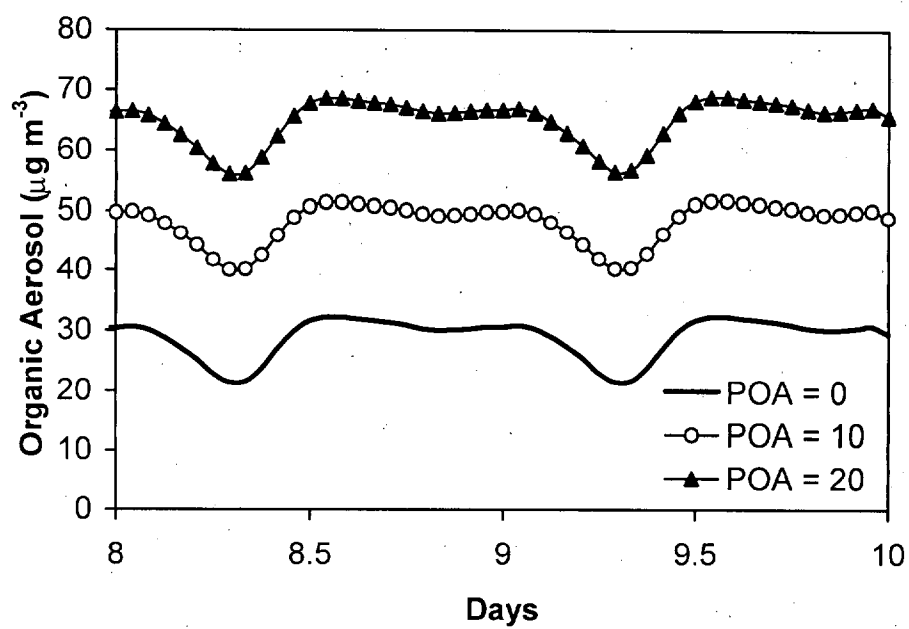

**Figure S6.** Daily AP organic aerosol concentrations for POA = 0, 10, 20  $\mu\text{g m}^{-3}$ .
